# Supplementary material
Source: publisher figshare collection journal article supplement (https://aacr.figshare.com/ndownloader/files/39997147)
Supplement: Supplementary file 1 [file 39997147]

**Table S1 Joint effects by cumulative amount of smoking and alcohol drinking on EPL (raw data)**

|  | ***p* value** | **OR** | **95% CI** | |
| --- | --- | --- | --- | --- |
| **Lower** | **Upper** |
| Pack-years * unit-years | 0.088 |  |  |  |
| Pack-years (1) by unit-years (1) | 0.641 | 0.805 | 0.324 | 2.002 |
| Pack-years (1) by unit-years (2) | 0.306 | 1.510 | 0.686 | 3.323 |
| Pack-years (1) by unit-years (3) | 0.145 | 0.229 | 0.032 | 1.665 |
| Pack-years (1) by unit-years (4) | 0.457 | 0.780 | 0.405 | 1.501 |
| Pack-years (2) by unit-years (1) | 0.015 | 3.540 | 1.277 | 9.815 |
| Pack-years (2) by unit-years (2) | 0.998 | 0.000 | 0.000 | . |
| Pack-years (2) by unit-years (3) | 0.605 | 0.685 | 0.164 | 2.865 |
| Pack-years (2) by unit-years (4) | 0.998 | 1.001 | 0.480 | 2.086 |
| Pack-years (3) by unit-years (1) | 0.488 | 1.691 | 0.383 | 7.478 |
| Pack-years (3) by unit-years (2) | 0.998 | 0.000 | 0.000 | . |
| Pack-years (3) by unit-years (3) | 0.301 | 1.913 | 0.560 | 6.537 |
| Pack-years (3) by unit-years (4) | 0.992 | 1.003 | 0.534 | 1.886 |
| Pack-years (4) by unit-years (1) | 0.006 | 4.339 | 1.528 | 12.323 |
| Pack-years (4) by unit-years (2) | 0.860 | 1.142 | 0.261 | 4.996 |
| Pack-years (4) by unit-years (3) | 0.283 | 0.335 | 0.046 | 2.468 |
| Pack-years (4) by unit-years (4) | 0.047 | 1.505 | 1.006 | 2.251 |
| Gender | 0.007 | 0.764 | 0.629 | 0.928 |
| Age group | 0.000 |  |  |  |
| Age group (1) | 0.000 | 2.156 | 1.641 | 2.832 |
| Age group (2) | 0.000 | 4.337 | 3.325 | 5.656 |
| Education | 0.098 | 0.853 | 0.706 | 1.030 |
| Annual income person | 0.548 |  |  |  |
| Annual income person (1) | 0.200 | 0.883 | 0.729 | 1.068 |
| Annual income person (2) | 0.226 | 0.856 | 0.667 | 1.100 |
| Annual income person (3) | 0.645 | 0.930 | 0.683 | 1.266 |
| BMI | 0.042 |  |  |  |
| BMI (1) | 0.975 | 0.989 | 0.511 | 1.914 |
| BMI (2) | 0.016 | 1.237 | 1.040 | 1.471 |
| BMI (3) | 0.026 | 1.322 | 1.033 | 1.691 |
